# Supplementary material for: Fossil Sirenia from the Pleistocene of Qatar: new questions about the antiquity of sea cows in the Gulf Region
Source: PeerJ. 2022 Oct 18;10:e14075. doi: 10.7717/peerj.14075 (PMC9586076; doi:10.7717/peerj.14075)
Supplement: Supplemental Information 3 — Supplemental dataset of first and second rib measurements from fossil and extant sirenians, including abbreviations. See main text for museum collection abbreviations. All measurements in mm. [file peerj-10-14075-s003.xlsx]

## Sheet: Rib 1 dataset (mm)
Group	Genus	species	Specimen	Side	Angle ll	Angle ap	Mid ll	Mid ap
Dugongidae	n/a	n/a	QM.2021.0504	R	23	14	30	12
Prorastomidae	cf. Pezosiren	portelli	USNM PAL 542916	L	19	15	32	18
Prorastomidae	Pezosiren	portelli	USNM PAL 542909	R	15	13	18	15
Prorastomidae	Pezosiren	portelli	USNM PAL 542909	L	18	18	20	15
Prorastomidae	Pezosiren	portelli	USNM PAL 542910	R	18	16	22	24
Prorastomidae	Pezosiren	portelli	USNM PAL 542910	L	18	18	27	20
Dugongidae	Nanosiren	sp.	USNM PAL 559306	R	32	22	28	30
Dugongidae	Nanosiren		USNM PAL 16630	R	29	22	28	29
Protosirenidae	Protosiren	smithae	UM 94810 (cast)	L	24	13	27	13
Protosirenidae	Protosiren	sattaensis	GSP-UM 3001 (cast)	R?	26	15	20	19
Dugongidae	Metaxytherium	calvertense	USNM PAL 16757	R	44	26	33	40
Dugongidae	Metaxytherium	calvertense	USNM PAL 16757	L	45	25	31	37
Trichechidae	Trichechus	manatus	USNM 550462	R	22	19	29	23
Trichechidae	Trichechus	manatus	USNM 550462	L	21	19	24	21
Dugongidae	Dugong	dugon	USNM 550456	R	50	25	34	30
Dugongidae	Dugong	dugon	USNM 550456	L	48	23	35	27
Dugongidae	Dugong	dugon	USNM 197900	R	30	9	17	11
Dugongidae	Dugong	dugon	USNM 197900	L	27	9	15	8
Dugongidae	Dugong	dugon	USNM 257107	R	42	18	26	17
Dugongidae	Dugong	dugon	USNM 257107	L	40	16	25	20
Dugongidae	Dugong	dugon	USNM 284441	R	36	15	20	14
Dugongidae	Hydrodamalis	gigas	USNM 35638	R	74	32	75	47
Dugongidae	Hydrodamalis	gigas	USNM 218380	R	60	32	70	47
Dugongidae	Hydrodamalis	gigas	USNM 21258	R	79	39	64	39
Trichechidae	Trichechus	manatus	USNM 14334	R	20	13	11	12
Trichechidae	Trichechus	manatus	USNM 14334	L	19	11	10	11
Trichechidae	Trichechus	manatus	USNM 217259	R	22	10	15	11
Trichechidae	Trichechus	manatus	USNM 217259	L	21	12	13	11
Trichechidae	Trichechus	inguinnis	USNM 20916	R	18	7	16	8
Trichechidae	Trichechus	inguinnis	USNM 20916	L	16	8	17	7
Trichechidae	Trichechus	manatus	USNM 238018	R	30	16	18	19
Trichechidae	Trichechus	manatus	USNM 238018	L	30	16	21	18
Trichechidae	Trichechus	manatus	USNM 256674	R	26	12	20	14
Trichechidae	Trichechus	manatus	USNM 527899	R	12	8	10	6
Trichechidae	Trichechus	manatus	USNM 527899	L	12	11	11	6
Trichechidae	Trichechus	manatus	USNM 527901	R	32	15	30	16
Trichechidae	Trichechus	manatus	USNM 527901	L	30	18	30	18
Trichechidae	Trichechus	manatus	USNM 527902	R	11	6	6	5
Trichechidae	Trichechus	manatus	USNM 527902	L	10	6	7	5
Trichechidae	Trichechus	manatus	USNM 527904	R	34	13	24	18
Trichechidae	Trichechus	manatus	USNM 527904	L	32	16	22	15
Trichechidae	Trichechus	manatus	USNM 527905	R	29	13	21	11
Trichechidae	Trichechus	manatus	USNM 527905	L	29	8	21	14
Trichechidae	Trichechus	manatus	USNM 527906	R	23	13	16	13
Trichechidae	Trichechus	manatus	USNM 527906	L	24	13	16	14
Trichechidae	Trichechus	manatus	USNM 527907	R	32	14	21	18
Trichechidae	Trichechus	manatus	USNM 527907	L	27	15	22	16
Trichechidae	Trichechus	manatus	USNM 527909	R	32	16	26	23
Trichechidae	Trichechus	manatus	USNM 527909	L	29	21	26	25
Trichechidae	Trichechus	manatus	USNM 527910	R	29	18	25	16
Trichechidae	Trichechus	manatus	USNM 527910	L	28	17	25	14
Trichechidae	Trichechus	manatus	USNM 527916	R	29	14	26	15
Trichechidae	Trichechus	manatus	USNM 527916	L	26	15	28	18

## Sheet: Rib 2 dataset (mm)
Group	Genus	species	Specimen	Side	Angle ll	Angle ap	Mid ll	Mid ap
Dugongidae	n/a	n/a	QM.2021.0504	R	23	14	30	12
Prorastomidae	Pezosiren	portelli	USNM PAL 542909	L	19	15	26	14
Dugongidae	Nanosiren	sp.	USNM PAL 559306	R	32	22	28	30
Dugongidae	Nanosiren	garciae	USNM PAL 323181	R	24	18	26	18
Dugongidae	Nanosiren	sp.	USNM PAL 16630	R	29	23	27	30
Dugongidae	Metaxytherium	calvertense	USNM PAL 16757	R	41	34	42	46
Dugongidae	Metaxytherium	calvertense	USNM PAL 16757	L	39	34	41	44
Trichechidae	Trichechus	manatus	USNM 550462	R	29	28	30	31
Trichechidae	Trichechus	manatus	USNM 550462	L	32	28	29	29
Dugongidae	Dugong	dugon	USNM 197900	R	38	12	24	15
Dugongidae	Dugong	dugon	USNM 197900	L	37	11	24	13
Dugongidae	Dugong	dugon	USNM 257107	R	35	22	31	18
Dugongidae	Dugong	dugon	USNM 257107	L	35	21	27	18
Dugongidae	Dugong	dugon	USNM 284441	R	47	18	30	19
Dugongidae	Hydrodamalis	gigas	USNM 35638	R	79	36	60	42
Trichechidae	Trichechus	manatus	USNM 14334	R	18	12	17	17
Trichechidae	Trichechus	manatus	USNM 14334	L	15	15	18	13
Trichechidae	Trichechus	inguinnis	USNM 20916	R	18	11	13	8
Trichechidae	Trichechus	inguinnis	USNM 20916	L	18	11	14	8
Trichechidae	Trichechus	manatus	USNM 238018	R	40	22	30	18
Trichechidae	Trichechus	manatus	USNM 238018	L	40	21	31	21
Trichechidae	Trichechus	manatus	USNM 256674	R	31	21	30	18
Trichechidae	Trichechus	manatus	USNM 527899	R	16	9	14	7
Trichechidae	Trichechus	manatus	USNM 527899	L	14	9	15	8
Trichechidae	Trichechus	manatus	USNM 527901	R	39	22	32	21
Trichechidae	Trichechus	manatus	USNM 527901	L	35	24	32	21
Trichechidae	Trichechus	manatus	USNM 527902	R	11	10	11	7
Trichechidae	Trichechus	manatus	USNM 527902	L	11	7	10	7
Trichechidae	Trichechus	manatus	USNM 527904	R	41	24	30	21
Trichechidae	Trichechus	manatus	USNM 527904	L	42	23	33	19
Trichechidae	Trichechus	manatus	USNM 527905	R	31	20	31	16
Trichechidae	Trichechus	manatus	USNM 527905	L	29	22	30	20
Trichechidae	Trichechus	manatus	USNM 527906	R	28	17	26	14
Trichechidae	Trichechus	manatus	USNM 527906	L	27	17	23	14
Trichechidae	Trichechus	manatus	USNM 527907	R	39	23	34	23
Trichechidae	Trichechus	manatus	USNM 527907	L	34	22	32	25
Trichechidae	Trichechus	manatus	USNM 527909	R	43	27	36	24
Trichechidae	Trichechus	manatus	USNM 527909	L	39	26	35	23
Trichechidae	Trichechus	manatus	USNM 527910	R	38	20	30	17
Trichechidae	Trichechus	manatus	USNM 527910	L	34	21	31	17
Trichechidae	Trichechus	manatus	USNM 527916	R	32	20	32	20
Trichechidae	Trichechus	manatus	USNM 527916	L	34	23	32	19

## Sheet: Abbreviations
Abbreviations
R	right
L	left
Angle ll	lateral thickness at the angle of the rib
Angle ap	anteroposterior thickness at the angle of the rib
Mid ll	lateral thickness at midshaft of the rib
Mid ap	anteroposterior thickness at midshaft of the rib
